# Supplementary material for: Targeted Transcriptomic Analysis of C57BL/6 and BALB/c Mice During Progressive Chronic Toxoplasma gondii Infection Reveals Changes in Host and Parasite Gene Expression Relating to Neuropathology and Resolution
Source: PubMed Central journal article supplement (PMC8012756; doi:10.3389/fcimb.2021.645778), 2021-03-18
Supplement: DataSheet_1.pdf [file DataSheet_1.pdf]

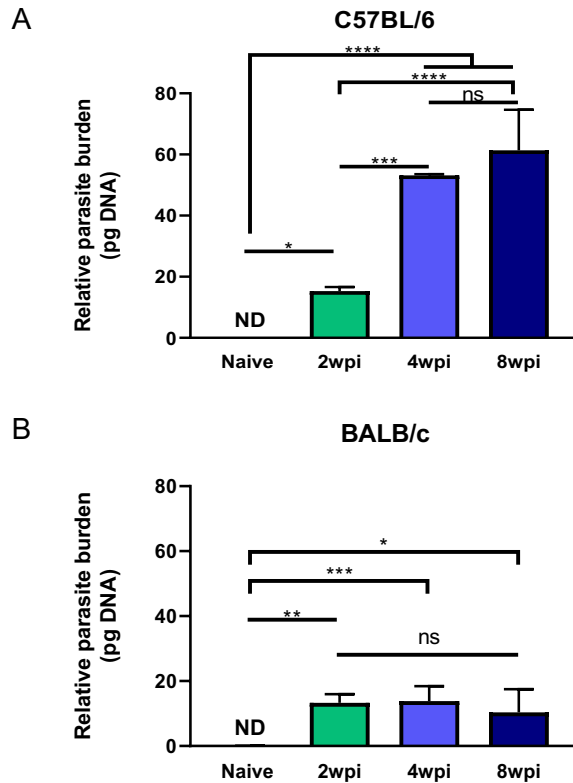

**Supplemental Figure 1. Representative brain parasite burden for susceptible and resistant mouse strains.** Quantified parasite burden from whole brain DNA via RT-PCR in susceptible C57BL/6 (n=4/time point) and resistant BALB/c (n=5/time point) mice. **(A)** C57BL/6 brain time point values were collected from multiple separate experiments and analyzed as an overall representation of parasite burden changes over chronic infection. **(B)** Brain samples from BALB/c mice collected for this study were tested and analyzed in parallel for parasite burden along with Nanostring nCounter analysis. Significance between timepoints determined by One-Way ANOVA using Multiple Comparisons (\* = p-value <0.05, \*\* = p-value <0.01, \*\*\* = p-value < 0.001, \*\*\*\* = p-value < 0.0001).

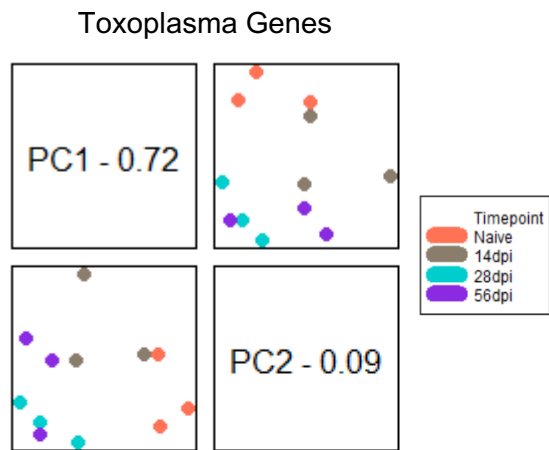

**Supplemental Figure 2. Intragroup variation in relation to Toxoplasma genes.** PCA plot of B6 biological replicates in relation to Toxoplasma gene expression at all time points. Numbers on axes represent percentage of variation in that component.
